# Supplementary material
Source: publisher site journal article supplement (https://www.dovepress.com/article/317631)
Supplement: Supplementary file 1 [file get_supplementary_file.php]

Supplementary Table 1: Clinicopathological characteristics of patients and immunohistochemical staining results of PABPC1, p53, Ki-67, and nm23 in 231 esophageal squamous cell carcinoma specimens.

| **Order** | **Operation time** | **Year** | **Gender** | **Tumor region in esophagus** | **Pathological type** | **Differentiation degree** | **Lymph node metastasis** | **Tumor size (a b c)** | **Pathological stage** |
| --- | --- | --- | --- | --- | --- | --- | --- | --- | --- |
| 1 | 2014/1/23 | 48 | man | Middle and lower | Medullary type | Well | 0/6 | 3 2 1.5 | ⅠB |
| 2 | 2014/1/23 | 61 | man | Middle | Medullary type | Well | 1/30 | 4.2 2.6 1 | ⅢB |
| 3 | 2014/2/17 | 56 | man | Upper | Ulcerative type | Well | 0/12 | 4 1.5 1 | ⅠB |
| 4 | 2014/2/24 | 67 | man | Middle and lower | Ulcerative type | Well and moderate | 0/8 | 1.5 1.5 1 | ⅡA |
| 5 | 2014/2/25 | 55 | man | Middle | Ulcerative type | Well | 0/12 | 4 2 1 | ⅠB |
| 6 | 2014/2/25 | 58 | man | Middle | Unknown | Moderate | 1/20 | 1.8 1.5 1 | ⅢA |
| 7 | 2014/2/28 | 56 | man | Upper | Ulcerative type | Well | 0/8 | 6 4 1 | ⅡA |
| 8 | 2014/2/28 | 49 | man | Middle | Ulcerative type | Well | 3/18 | 5 2.5 2 | ⅢB |
| 9 | 2014/2/28 | 60 | man | Middle | Ulcerative type | Moderate | 1/8 | 3 1.5 0.7 | ⅢA |
| 10 | 2014/3/10 | 56 | man | Middle | Medullary type | Well | 0/5 | 1.5 1 0.5 | ⅠA |
| 11 | 2014/3/19 | 60 | man | Middle and lower | Ulcerative type | Well | 0/17 | 2 1.5 1 | ⅠB |
| 12 | 2014/3/21 | 62 | man | Middle | Medullary type | Moderate | 0/14 | 5 3 1 | ⅡA |
| 13 | 2014/3/26 | 47 | woman | Middle | Ulcerative type | Well | 0/9 | 4 3.5 1 | ⅠA |
| 14 | 2014/3/26 | 68 | man | Middle | Mushroom type | Well | 0/6 | 3.5 3.5 2 | ⅠB |
| 15 | 2014/4/13 | 62 | man | Unknown | Ulcerative type | Moderate | 0/12 | 4.5 4 1 | ⅡA |
| 16 | 2014/4/15 | 56 | man | Middle and lower | Ulcerative type | Well and moderate | 0/6 | 2 1.8 1.5 | ⅣB |
| 17 | 2014/4/23 | 54 | man | Middle | Ulcerative type | Well | 0/15 | 1.5 1 0.3 | ⅠA |
| 18 | 2014/4/23 | 63 | woman | Middle and Upper | Ulcerative type | Moderate | 0/13 | 3.8 2 0.5 | ⅡA |
| 19 | 2014/4/24 | 62 | man | Middle | Ulcerative type | Well | 0/9 | 2.5 1 1 | ⅡA |
| 20 | 2014/4/28 | 56 | man | Lower | Ulcerative type | Well | 4 /34 | 5 3.5 2 | ⅢB |
| 21 | 2014/4/28 | 68 | woman | Middle | Medullary type | Well and moderate | 0/7 | 5 4 2 | ⅡB |
| 22 | 2014/5/4 | 74 | woman | Unknown | Ulcerative type | Well | 0/12 | 3.8 1.8 1.2 | ⅡA |
| 23 | 2014/5/5 | 65 | man | Middle and lower | Mushroom type | Well | 2/21 | 3.2 1.5 1.5 | ⅢB |
| 24 | 2014/5/7 | 54 | man | Middle | Ulcerative type | Moderate | 0/12 | 3 2 0.8 | ⅡB |
| 25 | 2014/5/8 | 60 | man | Middle | Medullary type | Moderate | 0/10 | 2.7 2.5 1.5 | ⅠB |
| 26 | 2014/5/15 | 61 | man | Middle | Ulcerative type | Well and moderate | 2/16 | 3 2.5 1.5 | ⅢB |
| 27 | 2014/5/19 | 51 | man | Middle and lower | Ulcerative type | Well | 0/35 | 5 2 1 | ⅠB |
| 28 | 2014/5/23 | 60 | man | Middle and lower | Ulcerative type | Well and moderate | 0/8 | 4 3 0.5 | ⅡA |
| 29 | 2014/5/23 | 65 | woman | Middle | Medullary type | Well | 3/14 | 4 3 2 | ⅢB |
| 30 | 2014/5/26 | 65 | man | Middle | Ulcerative type | Moderate | 3/25 | 6.2 2.2 1.7 | ⅢB |
| 31 | 2014/5/28 | 57 | man | Lower | Ulcerative type | Well | 1/49 | 8 5 2 | ⅢB |
| 32 | 2014/5/28 | 57 | woman | Middle | Ulcerative type | Moderate | 4/18 | 4 3 1 | ⅢA |
| 33 | 2014/6/5 | 68 | man | Middle and lower | Medullary type | Well | 2/39 | 3.5 5 2 | ⅢA |
| 34 | 2014/6/5 | 64 | woman | Middle | Ulcerative type | Well and moderate | 0/11 | 4 2.5 1 | ⅡB |
| 35 | 2014/6/12 | 74 | man | Middle | Medullary type | Well and moderate | 2/12 | 2 2 1 | ⅢB |
| 36 | 2014/6/19 | 54 | man | Middle | Mushroom type | Well | 0/18 | 3 2.5 1 | ⅠB |
| 37 | 2014/6/19 | 65 | man | UpperMiddle | Ulcerative type | Well and moderate | 2/40 | 3 2 0.5 | ⅢA |
| 38 | 2014/6/21 | 60 | man | Lower | Ulcerative type | Moderate | 0/20 | 8 6 2 | ⅡA |
| 39 | 2014/6/26 | 67 | man | Lower | Ulcerative type | Well | 0/23 | 4 2 1 | ⅠB |
| 40 | 2014/6/26 | 59 | man | Middle and lower | Ulcerative type | Well and moderate | 1/4 | 3.5 2 1 | ⅢA |
| 41 | 2014/6/26 | 68 | man | Lower | Medullary type | Well | 3/16 | 4 3.5 1 | ⅢB |
| 42 | 2014/6/26 | 70 | man | lower | Ulcerative type | Well | 0/14 | 4 2.8 2.5 | ⅡA |
| 43 | 2014/7/3 | 58 | man | Middle and lower | Ulcerative type | Well | 2/11 | 2.5 2.2 0.8 | ⅡB |
| 44 | 2014/7/7 | 48 | man | Middle and lower | Ulcerative type | Moderate | 13/43 | 5 2 0.5 | ⅣA |
| 45 | 2014/7/16 | 63 | man | Middle | Medullary type | Moderate | 21/27 | 3 2 1.5 | ⅣA |
| 46 | 2014/7/18 | 71 | man | Middle | Medullary type | Moderate | 0/36 | 2.5 1.5 1.5 | ⅡB |
| 47 | 2014/7/21 | 71 | man | Middle | Ulcerative type | Well | 0/11 | 5 5 4 | unknown |
| 48 | 2014/7/21 | 49 | man | Middle | Ulcerative type | Well and moderate | 2/41 | 4 4 2 | ⅢB |
| 49 | 2014/7/21 | 67 | man | Middle | Medullary type | Moderate | 0/34 | 2.5 1.5 1.5 | ⅡB |
| 50 | 2014/7/21 | 49 | woman | Middle | Ulcerative type | Moderate | 0/10 | 2 1 0.5 | ⅡA |
| 51 | 2014/7/29 | 56 | man | Middle | Ulcerative type | Well | 2/27 | 3.8 3.5 2 | ⅢB |
| 52 | 2014/7/29 | 57 | man | Middle | Medullary type | Moderate | 0/37 | 5 2.5 1.8 | ⅡB |
| 53 | 2014/7/31 | 59 | man | Unknown | Ulcerative type | Moderate | 1/15 | 6 4 2.5 | ⅢB |
| 54 | 2014/7/31 | 58 | man | Middle | Ulcerative type | Moderate | 0/11 | 3 3 2 | ⅡA |
| 55 | 2014/7/31 | 51 | man | Lower | Medullary type | Well | 4/39 | 5 3.5 2.5 | ⅢB |
| 56 | 2014/7/31 | 74 | man | Middle | Medullary type | Well | 0/8 | 3 2.5 1.5 | ⅡA |
| 57 | 2014/8/1 | 60 | man | Lower | Mushroom type | Well | 0/13 | 5 5 2 | ⅡA |
| 58 | 2014/8/6 | 69 | man | Middle | Ulcerative type | Moderate | 0/54 | 4 3 0.7 | ⅡB |
| 59 | 2014/8/10 | 51 | man | Lower | Medullary type | Moderate-Well | 1/18 | 5 4 1 | ⅢA |
| 60 | 2014/8/8 | 57 | man | Middle | Mushroom type | Moderate | 2/17 | 3.5 2 1 | ⅢA |
| 61 | 2014/8/10 | 49 | woman | Unknown | Ulcerative type | Well and moderate | 0/5 | 4 3 2 | ⅡB |
| 62 | 2014/8/18 | 67 | woman | Middle | Ulcerative type | Well | 0/18 | 3.5 1 1 | ⅡA |
| 63 | 2014/8/26 | 70 | man | Middle | Ulcerative type | Well and moderate | 1/6 | 5 4 1.5 | ⅢB |
| 64 | 2014/9/5 | 50 | woman | Middle and lower | Mushroom type | Low | 4/9 | 15 7 6 | ⅣA |
| 65 | 2014/9/11 | 78 | woman | Middle | Mushroom type | Well | 0/13 | 2.5 2 2 | ⅡA |
| 66 | 2014/9/11 | 50 | man | Lower | Ulcerative type | Well | 2/20 | 4 3.5 1.5 | ⅢB |
| 67 | 2014/9/12 | 62 | man | Middle | Mushroom type | Well | 0/21 | 4 3 2 | ⅡA |
| 68 | 2014/9/17 | 70 | man | Middle | Medullary type | Well | 0/9 | 2.5 1.5 0.5 | ⅠB |
| 69 | 2014/9/17 | 57 | man | Middle | Ulcerative type | Low | 2/20 | 5 2.5 1 | ⅢB |
| 70 | 2014/9/18 | 50 | man | Middle | Ulcerative type | Well | 1/20 | 5 4 1.5 | ⅢA |
| 71 | 2014/9/19 | 60 | man | Lower | Ulcerative type | Moderate and low | 0/9 | 4.5 2 0.5 | ⅡA |
| 72 | 2014/9/24 | 65 | man | Lower | Ulcerative type | Well | 0/34 | 4 1.8 1 | ⅠB |
| 73 | 2014/9/25 | 59 | man | Lower | Ulcerative type | Moderate | 0/29 | 5 3 1.3 | ⅠB |
| 74 | 2014/9/30 | 49 | man | Lower | Medullary type | Well | 0/9 | 3.5 3 1.5 | ⅡA |
| 75 | 2014/9/30 | 57 | man | Lower | Ulcerative type | Moderate | 0/19 | 4 2 1 | ⅡA |
| 76 | ######## | 62 | man | Middle | Ulcerative type | Moderate | 0/18 | 4 2 2 | ⅡA |
| 77 | ######## | 69 | man | Lower | Ulcerative type | Well | 0/22 | 3 2.5 2 | ⅠB |
| 78 | 2014/11/4 | 66 | man | Middle and lower | Unknown | Well | 0/22 | 5.5 4 2.2 | ⅡA |
| 79 | ######## | 77 | woman | Middle | Ulcerative type | Well and moderate | 0/15 | 1.5 1.5 1.2 | ⅡA |
| 80 | ######## | 58 | man | Middle and lower | Ulcerative type | Well | 0/20 | 6 4 1.5 | ⅠB |
| 81 | 2014/12/1 | 60 | man | Lower | Medullary type | Moderate | 0/15 | 5 3 2.5 | ⅡA |
| 82 | 2014/12/8 | 61 | man | Middle and lower | Ulcerative type | Moderate | 0/9 | 2 1.5 0.4 | ⅠB |
| 83 | 2014/12/8 | 74 | woman | Middle | Ulcerative type | Moderate | 2/28 | 5 4.5 1.5 | ⅢA |
| 84 | 2014/12/9 | 67 | man | Middle | Medullary type | Well and moderate | 7/21 | 4 2.5 1.5 | ⅣA |
| 85 | ######## | 57 | man | Middle | Ulcerative type | Well | 3/19 | 3.5 2.5 0.8 | ⅢB |
| 86 | ######## | 71 | man | Lower | Unknown | Well | 1/6 | 3.5 2.5 2.5 | ⅢA |
| 87 | ######## | 64 | woman | Lower | Ulcerative type | Well and moderate | 1/17 | 3 3.5 0.8 | ⅢA |
| 88 | ######## | 60 | man | Middle | Ulcerative type | Well and moderate | 0/20 | 2.5 2.5 0.5 | ⅡA |
| 89 | ######## | 48 | man | Middle and lower | Constrictive type | Well and moderate | 0/4 | 3.5 3.5 1 | ⅡB |
| 90 | ######## | 78 | man | Middle | Medullary type | Well and moderate | 2/8 | 4 2 2 | ⅢB |
| 91 | 2014/1/6 | 66 | woman | Middle | Medullary type | Well | 1/15 | 4 3 2 | ⅢB |
| 92 | 2013/1/16 | 65 | man | Unknown | Ulcerative type | Well | 0/12 | 4 2 2 | ⅡA |
| 93 | 2013/1/18 | 69 | woman | Middle and lower | Medullary type | Well | 0/8 | 3.5 1.5 1 | ⅠB |
| 94 | 2013/1/22 | 60 | man | Middle | Ulcerative type | Moderate | 3/13 | 4.5 3 2 | ⅣB |
| 95 | 2013/1/29 | 75 | woman | Middle | Ulcerative type | Low | 6/21 | 3.5 3 0.5 | ⅢB |
| 96 | 2012/2/1 | 59 | woman | Middle | Medullary type | Well | 0/4 | 3.5 3 1.5 | ⅠB |
| 97 | 2013/2/6 | 62 | man | Middle and lower | Ulcerative type | Moderate | 0/5 | 4 3.5 1.5 | ⅠB |
| 98 | 2013/2/26 | 46 | man | Middle | Ulcerative type | Well | 3/19 | 5.3 5.3 0.6 | ⅢB |
| 99 | 2013/2/27 | 76 | man | Unknown | Constrictive type | Moderate | 2/27 | 2 1.4 1.1 | ⅢA |
| 100 | 2013/2/27 | 71 | man | Middle | Mushroom type | Low | 1/4 | 3 1 1 | ⅢB |
| 101 | 2013/3/1 | 61 | man | Middle and Upper | Medullary type | Low | 1/19 | 2 1 0.5 | ⅢB |
| 102 | 2013/3/6 | 53 | man | Middle | Ulcerative type | Well | 0/11 | 4.5 1 1 | ⅡA |
| 103 | 2013/3/13 | 59 | man | Middle | Ulcerative type | Well | 1/7 | 5 4 2 | ⅢB |
| 104 | 2013/3/13 | 47 | man | Lower | Ulcerative type | Well and moderate | 5/34 | 3.5 2 1.5 | ⅢB |
| 105 | 2013/3/15 | 59 | man | Middle and lower | Ulcerative type | Well | 0/8 | 4 2 1.5 | ⅡA |
| 106 | 2013/3/19 | 50 | man | Middle and lower | Ulcerative type | Moderate | 4/8 | 5 3 1 | ⅢB |
| 107 | 2013/3/19 | 57 | man | Middle | Ulcerative type | Moderate | 1/43 | 2.5 1.5 0.3 | ⅢA |
| 108 | 2013/3/2 | 58 | man | Middle and lower | Ulcerative type | Well and moderate | 6/19 | 3 3 1 | ⅢB |
| 109 | 2013/3/26 | 76 | man | Middle and lower | Ulcerative type | Moderate | 3/7 | 4 3 2 | ⅢB |
| 110 | 2013/3/26 | 59 | woman | Middle and lower | Ulcerative type | Moderate | 2/28 | 3 2 1 | ⅢA |
| 111 | 2013/4/9 | 70 | man | Upper | Ulcerative type | Well | 0/16 | 3 2 1.3 | ⅡA |
| 112 | 2013/4/12 | 63 | man | Middle and lower | Medullary type | Well | 0/11 | 6 4 2 | ⅢB |
| 113 | 2013/4/19 | 61 | man | Upper | Ulcerative type | Well | 0/21 | 5 3 1 | ⅡA |
| 114 | 2013/5/2 | 55 | man | Middle | Medullary type | Well | 0/10 | 1.1 1 0.4 | ⅠB |
| 115 | 2013/5/2 | 61 | man | Middle and lower | Ulcerative type | Well | 0/6 | 5.5 2 1 | ⅡA |
| 116 | 2013/4/28 | 56 | man | Middle | Ulcerative type | Well | 0/11 | 3.5 2.5 2 | ⅡA |
| 117 | 2013/4/28 | 60 | man | Unknown | Ulcerative type | Well | 3/22 | 4 2 1 | ⅢB |
| 118 | 2013/5/8 | 70 | man | Middle | Constrictive type | Well | 0/9 | 2.5 2 1 | ⅡA |
| 119 | 2013/5/8 | 67 | man | Middle and lower | Medullary type | Well and moderate | 0/6 | 1.5 1.2 0.6 | ⅡA |
| 120 | 2013/5/17 | 59 | woman | Upper | Mushroom type | Well | 0/10 | 2 2 1.5 | ⅡA |
| 121 | 2013/5/2 | 49 | man | Middle | Ulcerative type | Moderate | 0/7 | 1.2 1 0.5 | ⅠA |
| 122 | 2013/6/3 | 69 | man | Middle and lower | Ulcerative type | Well | 1/12 | 3.5 2 1.5 | ⅢB |
| 123 | 2013/6/3 | 63 | man | Unknown | Ulcerative type | Well | 1/8 | 3 2.5 1 | ⅢB |
| 124 | 2013/6/14 | 69 | man | Middle | Medullary type | Well | 0/8 | 2.8 2 1.5 | ⅡA |
| 125 | 2013/7/17 | 61 | man | Lower | Mushroom type | Well | 0/5 | 3.5 1 1 | ⅠA |
| 126 | 2013/7/3 | 62 | man | Upper | Ulcerative type | Well and moderate | 1/9 | 3 2 1 | ⅢB |
| 127 | 2013/8/6 | 50 | man | Middle and upper | Ulcerative type | Well | 2/13 | 3 2 1 | ⅢB |
| 128 | 2013/8/22 | 58 | man | Middle and lower | Ulcerative type | Moderate | 3/6 | 4 3 1.5 | ⅢB |
| 129 | 2013/8/23 | 79 | man | Middle | Ulcerative type | Moderate | 1/13 | 2 2 1 | ⅢA |
| 130 | 2013/8/24 | 58 | man | Middle and lower | Ulcerative type | Low | 5/24 | 4.5 4 1 | ⅢB |
| 131 | 2013/8/27 | 57 | man | Middle and lower | Ulcerative type | Moderate | 0/22 | 6 4 1.5 | ⅡB |
| 132 | 2013/9/11 | 58 | man | Middle | Ulcerative type | Well and moderate | 2/18 | 3 3 1.5 | ⅢB |
| 133 | ######## | 72 | man | Middle and lower | Ulcerative type | Moderate | 11/24 | 4 3 1 | ⅣA |
| 134 | ######## | 64 | man | Unknown | Medullary type | Moderate | 2/11 | 4 2 1 | ⅢB |
| 135 | ######## | 61 | man | Lower | Ulcerative type | Moderate and low | 1/45 | 4.5 2 1 | ⅢA |
| 136 | ######## | 48 | man | Middle | Ulcerative type | Well | 0/12 | 4 2.5 1 | ⅡA |
| 137 | ######## | 58 | man | Middle and lower | Unknown | Well | 0/17 | 4 2.5 1.5 | ⅡA |
| 138 | 2013/11/3 | 61 | man | Middle and lower | Ulcerative type | Moderate and low | 4/10 | 2.5 2 1 | ⅢB |
| 139 | 2013/12/4 | 61 | woman | Upper | Ulcerative type | Well and moderate | 0/15 | 2.5 2 0.8 | ⅡB |
| 140 | 2013/12/4 | 43 | man | Middle | Ulcerative type | Well and moderate | 0/13 | 5 4 1 | ⅡB |
| 141 | 2013/12/5 | 72 | man | Upper | Medullary type | Well | 0/53 | 3 1 1 | ⅡA |
| 142 | 2013/12/6 | 59 | man | Lower | Ulcerative type | Well and moderate | 1/15 | 6 3 1 | ⅢB |
| 143 | ######## | 59 | man | Lower | Medullary type | Well | 1/2 | 6 2.5 1.5 | ⅡB |
| 144 | ######## | 67 | man | Middle | Constrictive type | Well | 0/14 | 2 2 1.5 | ⅡA |
| 145 | ######## | 60 | man | Middle and lower | Medullary type | Moderate and low | 1/24 | 3 2.5 2 | ⅢB |
| 146 | ######## | 56 | man | Middle | Constrictive type | Well | 6/29 | 3.5 2 1.5 | ⅢB |
| 147 | 2015/1/5 | 70 | man | Middle and lower | Ulcerative type | Moderate | 1/18 | 4.5 3 1.1 | ⅢB |
| 148 | 2015/1/15 | 55 | man | Middle | Ulcerative type | Moderate | 2/16 | 3 2 1 | ⅢB |
| 149 | 2015/1/17 | 67 | man | Middle | Ulcerative type | Moderate | 0/11 | 4.5 3 1 | ⅡB |
| 150 | 2015/1/17 | 70 | man | Lower | Medullary type | Well | 0/14 | 3 2.5 1.5 | ⅡA |
| 151 | 2015/1/20 | 65 | woman | Lower | Ulcerative type | Well and moderate | 5/14 | 5 2 1 | ⅢB |
| 152 | 2015/1/22 | 66 | woman | Unknown | Ulcerative type | Well | 0/20 | 5 3 1.5 | ⅢB |
| 153 | 2015/1/23 | 68 | man | Middle and lower | Ulcerative type | Moderate | 3/6 | 2 1.5 1.5 | ⅢB |
| 154 | 2015/1/29 | 63 | man | Lower | Unknown | Moderate | 2/38 | 4 4 1.3 | ⅢA |
| 155 | 2015/2/3 | 60 | man | Middle | Ulcerative type | Well | 2/3 | 4 4 1.5 | ⅢA |
| 156 | 2015/2/6 | 69 | man | Middle and lower | Ulcerative type | Well | 0/10 | 5.5 3.5 1.2 | ⅠB |
| 157 | 2015/2/16 | 59 | man | Middle and lower | Mushroom type | Well and moderate | 0/17 | 5.7 2 1.5 | ⅡA |
| 158 | 2015/3/7 | 55 | man | Upper | Ulcerative type | Moderate and low | 3/16 | 5 3 0.5 | ⅢB |
| 159 | 2015/3/7 | 70 | man | Middle | Ulcerative type | Well | 3/20 | 5 2.5 2.5 | ⅢB |
| 160 | 2015/3/13 | 61 | man | Middle and upper | Medullary type | Moderate | 1/14 | 4 3 1.6 | ⅢA |
| 161 | 2015/3/13 | 47 | man | Middle | Constrictive type | Well | 0/13 | 3 3 0.9 | ⅡA |
| 162 | 2015/3/18 | 62 | man | Middle | Medullary type | Well | 1/33 | 7.5 3.2 1.8 | ⅢA |
| 163 | 2015/3/26 | 65 | man | Lower | Ulcerative type | Well and moderate | 4/13 | 4 4 1 | ⅢB |
| 164 | 2015/3/26 | 64 | man | Middle and lower | Unknown | Moderate | 0/12 | 4 3.5 1.5 | ⅡA |
| 165 | ######## | 51 | man | Middle and lower | Mushroom type | Moderate | 3/29 | 4.5 2 2.5 | ⅢB |
| 166 | ######## | 55 | woman | Unknown | Medullary type | Well and moderate | 0/6 | 4 2 2 | ⅡB |
| 167 | ######## | 62 | man | Lower | Ulcerative type | Moderate | 6/34 | 6.7 4.7 2.5 | ⅢB |
| 168 | ######## | 59 | man | Middle | Ulcerative type | Moderate | 2/21 | 3 2.3 0.8 | ⅢB |
| 169 | ######## | 66 | man | Middle | Ulcerative type | Well | 0/7 | 3 2 0.2 | ⅠA |
| 170 | 2012/12/7 | 64 | man | Middle andupper | Ulcerative type | Well and moderate | 6/17 | 5 3 2 | ⅢB |
| 171 | ######## | 73 | man | Middle | Medullary type | Moderate and low | 2/7 | 3 2.5 1.5 | ⅡB |
| 172 | ######## | 46 | man | Middle | Ulcerative type | Well and moderate | 3/25 | 4 3 2 | ⅢB |
| 173 | ######## | 67 | man | Upper | Ulcerative type | Moderate | 0/4 | 3.5 2.5 1 | ⅡB |
| 174 | ######## | 62 | man | Middle | Medullary type | Well | 0/35 | 3 2.5 1 | ⅠA |
| 175 | ######## | 61 | man | Middle and lower | Constrictive type | Well | 2/10 | 3.5 3 1.2 | ⅢB |
| 176 | ######## | 65 | man | Middle | Mushroom type | Well | 0/3 | 1.5 1.5 1 | ⅠB |
| 177 | ######## | 75 | man | Middle and lower | Ulcerative type | Well | 1/8 | 6 3 2.5 | ⅢA |
| 178 | 2012/11/8 | 45 | man | Lower | Ulcerative type | Moderate and low | 2/18 | 8 3 1.5 | ⅢB |
| 179 | 2012/11/8 | 61 | man | Lower | Ulcerative type | Well and moderate | 10/14 | 4.5 3 3 | ⅣB |
| 180 | 2012/11/2 | 62 | man | Middle | Constrictive type | Well | 4/20 | 4 3 1 | ⅢB |
| 181 | ######## | 64 | man | Upper | Ulcerative type | Well | 1/8 | 3 1.5 0.7 | ⅢB |
| 182 | ######## | 59 | man | Lower | Ulcerative type | Well | 2/4 | 5 3 1 | ⅢB |
| 183 | ######## | 45 | man | Lower | Ulcerative type | Well | 3/20 | 4 1.5 1 | ⅢB |
| 184 | ######## | 72 | man | Middle and lower | Ulcerative type | Well and moderate | 1/8 | 1.5 1.2 0.6 | ⅢB |
| 185 | ######## | 73 | man | Middle and lower | Ulcerative type | Well and moderate | 0/9 | 2.5 1.5 1 | ⅡB |
| 186 | 2012/10/9 | 63 | man | Middle and lower | Ulcerative type | Moderate | 0/20 | 2.5 1.5 1 | ⅠB |
| 187 | 2012/9/13 | 66 | man | Lower | Ulcerative type | Well | 0/20 | 2.5 1 1 | ⅡA |
| 188 | 2012/9/4 | 61 | woman | Middle | Ulcerative type | Well | 0/14 | 4.5 3 1 | ⅡA |
| 189 | 2012/9/4 | 68 | man | Middle | Ulcerative type | Moderate | 0/15 | 4.5 2 1 | ⅡB |
| 190 | 2012/9/3 | 50 | man | Middle | Medullary type | Well | 1/9 | 3.2 2.5 0.5 | ⅢB |
| 191 | 2012/8/23 | 63 | man | Middle | Ulcerative type | Well | 0/11 | 4 2 1.5 | ⅡA |
| 192 | 2012/8/23 | 44 | man | Middle | Ulcerative type | Moderate and low | 2/27 | 4.5 2.5 1 | ⅢB |
| 193 | 2012/8/1 | 59 | man | Middle | Ulcerative type | Moderate | 2/21 | 5.5 2 1 | ⅢB |
| 194 | 2012/8/1 | 69 | man | Unknown | Ulcerative type | Low | 1/25 | 4.5 31 | ⅢA |
| 195 | 2012/7/20 | 65 | man | Lower | Medullary type | Well | 0/16 | 3.3 2 0.9 | ⅠB |
| 196 | 2012/7/16 | 77 | man | Middle | Ulcerative type | Well and moderate | 0/9 | 3.5 2 1 | ⅠB |
| 197 | 2012/7/6 | 63 | man | Middle and lower | Ulcerative type | Moderate | 2/13 | 5 3 1 | ⅢB |
| 198 | 2012/7/5 | 66 | man | Unknown | Ulcerative type | Moderate | 2/22 | 4 2 1 | ⅢB |
| 199 | 2012/6/30 | 56 | man | Middle | Medullary type | Well and moderate | 0/13 | 7 3.5 2 | ⅡB |
| 200 | 2012/6/19 | 57 | man | Middle | Ulcerative type | Well | 0/23 | 3.5 2 1.5 | ⅡA |
| 201 | 2012/6/19 | 66 | man | Middle and lower | Ulcerative type | Moderate | 1/22 | 4 2 1 | ⅢB |
| 202 | 2012/6/19 | 49 | man | Middle and lower | Mushroom type | Well and moderate | 0/19 | 2 1 1 | ⅡB |
| 203 | 2012/6/18 | 48 | man | Middle | Ulcerative type | Well | 7/27 | 4 3 0.6 | ⅣA |
| 204 | 2012/6/14 | 64 | woman | Upper | Ulcerative type | Well and moderate | 0/10 | 3.5 2.5 0.5 | ⅠB |
| 205 | 2012/6/12 | 59 | man | Middle and lower | Ulcerative type | Well and moderate | 6/24 | 4 3 1.5 | ⅢB |
| 206 | 2012/6/8 | 55 | man | Middle and lower | Ulcerative type | Moderate | 5/13 | 3 2 1.5 | ⅢB |
| 207 | 2012/6/7 | 66 | man | Middle and lower | Ulcerative type | Well | 0/14 | 4 3 0.5 | ⅠB |
| 208 | 2012/6/6 | 57 | woman | Middle and lower | Mushroom type | Well | 1/7 | 2 2 1.5 | ⅢA |
| 209 | 2012/6/5 | 55 | man | Lower | Ulcerative type | Well | 1/10 | 3 2 2 | ⅢB |
| 210 | 2012/6/4 | 67 | man | Middle | Ulcerative type | Moderate | 3/15 | 7 5 1 | ⅢB |
| 211 | 2012/6/4 | 61 | woman | Middle | Mushroom type | Moderate | 0/8 | 2 1.4 1 | ⅡA |
| 212 | 2012/5/25 | 63 | man | Middle | Ulcerative type | Well and moderate | 1/6 | 5.5 3 2 | ⅢB |
| 213 | 2012/5/25 | 56 | woman | Middle | Ulcerative type | Well | 0/8 | 4 2 1 | ⅠB |
| 214 | 2012/5/24 | 57 | man | Middle | Ulcerative type | Well | 0/9 | 3 2 1.5 | ⅡA |
| 215 | 2012/5/21 | 63 | man | Middle and lower | Mushroom type | Low | 1/10 | 6 3 2 | ⅢB |
| 216 | 2012/5/18 | 60 | man | Unknown | Medullary type | Well and moderate | 0/8 | 3.5 3 2 | ⅡB |
| 217 | 2012/5/12 | 56 | man | Middle and lower | Ulcerative type | Well and moderate | 0/1 | 4 2.5 2 | ⅡB |
| 218 | 2012/5/15 | 58 | man | Middle | Ulcerative type | Well and moderate | 0/11 | 3 2.5 1 | ⅡB |
| 219 | 2012/5/17 | 52 | man | Middle | Ulcerative type | Moderate | 0/10 | 3 2 1 | unknown |
| 220 | 2012/5/3 | 46 | man | Lower | Constrictive type | Moderate | 0/4 | 3.5 1.2 1.5 | ⅡB |
| 221 | 2012/4/28 | 49 | man | Middle | Ulcerative type | Moderate | 2/5 | 8.5 4 2.5 | ⅢB |
| 222 | 2012/4/1 | 66 | man | Lower | Unknown | Moderate and low | 4/15 | 5 5 2.5 | ⅣA |
| 223 | 2012/4/1 | 63 | man | Lower | Ulcerative type | Moderate | 3/7 | 5 2.5 0.5 | ⅢB |
| 224 | 2012/3/3 | 65 | man | Lower | Ulcerative type | Moderate | 0/8 | 4 1.5 1.2 | ⅡB |
| 225 | 2012/3/3 | 47 | man | Lower | Ulcerative type | Well | 0/16 | 5 4.5 0.8 | ⅡA |
| 226 | 2012/3/28 | 59 | man | Middle and lower | Ulcerative type | Well | 3/9 | 3 1.5 1 | ⅢB |
| 227 | 2012/3/26 | 60 | man | Lower | Ulcerative type | Well | 0/26 | 4 2.5 1.5 | ⅡA |
| 228 | 2012/3/23 | 78 | man | Lower | Ulcerative type | Well | 6/16 | 4.5 2.5 2 | ⅣA |
| 229 | 2012/3/22 | 66 | woman | Middle | Mushroom type | Well and moderate | 4/4 | 3 2 1.5 | ⅢB |
| 230 | 2012/3/16 | 67 | man | Middle and lower | Ulcerative type | Well | 2/14 | 5 4 2 | ⅢB |
| 231 | 2012/3/14 | 59 | man | Unknown | Ulcerative type | Moderate and low | 1/9 | 5.5 1.5 1 | ⅢB |

| **Order** | **Smoking and drinking habit** | **Outcome** | **Tumor occurrence** | **Ki-67 (%)** | **p53 (%)** | **Nm23 (%)** | **PABPC1 in ESCC tissue (%)** | **PABPC1 in matched normal epithelial tissue (%)** |
| --- | --- | --- | --- | --- | --- | --- | --- | --- |
| 1 | Smoking for 30 + years, 20 cigarettes / day, no drinking | Alive | No | 55 | 0 | 80 | 40 | 0 |
| 2 | A large number of tobacco and alcohol intake history | Died, one year after operation | Yes | 40 | 0 | 10 | 35 | 0 |
| 3 | Smoking 30 + years, 20 cigarettes / day, drinking 30 + years, 300g / day | Died, six months after operation | Yes | 50 | 0 | 60 | 55 | 0 |
| 4 | Smoking for 40 years, 6 cigarettes / day, no drinking | Died in 08/2016 | Yes | 50 | 0 | 0 | 15 | 5 |
| 5 | Smoking paper cigarettes for 30 years, about 10 cigarettes a day, no liquor | alive | No | 40 | 30 | 95 | 35 | 0 |
| 6 | no | Died in 10/2015 | Yes | 60 | 0 | 50 | 80 | 2 |
| 7 | Smoking for 30 + years, 10 cigarettes / day, drinking for 30 + years, occasionally drinking | Died after operation |  | 30 | 53 | 75 | 15 | 0 |
| 8 | Smoking for 20 years, 10 cigarettes / day, drinking for 20 years, 100g / day | Alive | Yes | 40 | 10 | 80 | 0 | 0 |
| 9 | Smoking for 40 + years, 15 cigarettes / day, drinking for 40 + years, 100g / day | Died in 03/2019 | Yes | 50 | 0 | 60 | 0 | 0 |
| 10 | Smoking for 30 + years, about 20 cigarettes / day, drinking for 30 + years, 125g / day | Alive | No | 60 | 5 | 80 | 35 | 0 |
| 11 | Smoking for 30 + years, about 40 cigarettes / day, drinking for 10 + years, 125g / day | Died in 11/2016 | Yes | 10 | 0 | 0 | 75 | 0 |
| 12 | Smoking for 40 years, 20 cigarettes a day, drinking for 40 years, 500 grams a day | Alive | No | 60 | 30 | 40 | 20 | 5 |
| 13 | Smoking 40 + years, 10 cigarettes / day, smoking 1 + years, drinking 40 + years, 250G / day | Died after operation | \ | 50 | 0 | 90 | 90 | 0 |
| 14 | Smoke 40 + years, 50g / day, drink 40 years, 100g / day | Died after operation | \ | 55 | 20 | 80 | 80 | 0 |
| 15 | Smoking for 20 years, 10 cigarettes / day, drinking for 10 years, 100g / day, and abstinence for about 10 + years | Died in 03/2016 | Yes | 30 | 40 | 80 | 85 | 0 |
| 16 | no | Died in 03/2016 | Yes, in 02/2015 | 15 | 0 | 80 | 50 | 5 |
| 17 | unknown | Alive | No | 20 | 0 | 80 | 35 | 0 |
| 18 | no | Alive | No | 70 | 50 | 80 | 70 | 0 |
| 19 | no | Alive | No | 60 | 15 | 80 | 0 | 0 |
| 20 | Smoking for 30 years, 40 cigarettes a day, drinking for 30 years, 500 grams a day | Died in 2017 | Yes, two years after operation | 40 | 70 | 80 | 40 | 0 |
| 21 | no | Alive | Yes | 25 | 40 | 0 | 20 | 0 |
| 22 | no | Died in 10/2015 | Yes | 40 | 80 | 75 | 75 | 0 |
| 23 | Smoking for 30 + years, 20 cigarettes / day, drinking history, now quit | Lost visit | \ | 45 | 20 | 90 | 15 | 0 |
| 24 | Smoking for 40 + years, 5 cigarettes per day, drinking for 40 + years, 300g / day | Died in 06/2015 | Yes, 6 months after operation | 80 | 5 | 70 | 10 | 0 |
| 25 | no | Alive | No | 60 | 0 | 90 | 0 | 0 |
| 26 | unknown | Lost visit | \ | 40 | 0 | 80 | 0 | 0 |
| 27 | Drinking and smoking history 40 years, quantity unknown | Lost visit | \ | 50 | 90 | 60 | 10 | 0 |
| 28 | no | Lost visit | \ | 70 | 0 | 50 | 35 | 0 |
| 29 | no | Lost visit | \ | 25 | 80 | 70 | 10 | 0 |
| 30 | No smoking history, drinking 40 + years, average 250G / day | Lost visit | \ | 75 | 5 | 50 | 25 | 0 |
| 31 | Tobacco 40 + years, 20 + cigarettes / day, alcohol 20 + years, 200-250 g / day, quit 1 + year | Alive | Yes, in 05/2018 | 20 | 30 | 5 | 65 | 0 |
| 32 | no | Died in 12/2015 | Yes | 60 | 95 | 60 | 55 | 0 |
| 33 | no | Died, two years after operation | Yes | 60 | 0 | 60 | 40 | 0 |
| 34 | no | Alive | No | 30 | 65 | 80 | 0 | 0 |
| 35 | no | Lost visit | \ | 25 | 70 | 75 | 65 | 0 |
| 36 | no | Lost visit | \ | 30 | 1 | 80 | 70 | 0 |
| 37 | Smoking and drinking for 30 years, 20 cigarettes per day, 250g alcohol per day | Lost visit | \ | 80 | 0 | 40 | 20 | 0 |
| 38 | 20 + years smoking history, 2-3 cigarettes per day | Alive | No | 70 | 80 | 60 | 0 | 0 |
| 39 | no | Lost visit | \ | 30 | 0 | 5 | 20 | 0 |
| 40 | no | Died, ten months after operation | Yes, 8 months after operation | 60 | 80 | 30 | 60 | 0 |
| 41 | Smoking for 40 years, 20 cigarettes / day, 10 days. Wine 20 + years, quantity unknown | Died, five months after operation | Yes | 60 | 0 | 10 | 10 | 0 |
| 42 | No smoking, little drinking, unknown | Alive | No | 40 | 0 | 30 | 5 | 0 |
| 43 | no | Alive | No | 50 | 90 | 30 | 10 | 0 |
| 44 | Smoking for 30 years, 10 cigarettes / day, drinking for 30 years, 500g / day | Died in 09/2015 | Yes | 50 | 0 | 40 | 15 | 0 |
| 45 | Tobacco 30 + years, 20 cigarettes / day, wine 30 + years, 400g / day | Lost visit | \ | 25 | 0 | 20 | 25 | 0 |
| 46 | Smoking for 40 years, 20 cigarettes / day, drinking for 40 years, 50g / day | Died, two months after operation | No | 40 | 80 | 30 | 85 | 0 |
| 47 | Tobacco 50 years, 20 cigarettes / day, wine 50 years, 400g / day | Alive | No | 40 | 15 | 0 | 45 | 0 |
| 48 | Smoking for 30 years, 20 cigarettes / day, drinking for 20 years, 500g / day | Died, 12 months after operation | Yes | 25 | 90 | 40 | 50 | 0 |
| 49 | Smoking for 40 + years, about 15 cigarettes per day; drinking, 100g / day | Alive | No | 40 | 80 | 30 | 35 | 0 |
| 50 | no | Lost visit | \ | 60 | 0 | 70 | 15 | 0 |
| 51 | Tobacco 30 + years, 20 cigarettes / day, wine 30 + years, 250 g / day | Died, thirty months after operation | Yes, 12 months after operation | 8 | 0 | 50 | 55 | 2 |
| 52 | Tobacco 30 + years, 10 cigarettes / day, wine 30 + years, about 200g / day | Lost visit | \ | 85 | 85 | 70 | 30 | 0 |
| 53 | no | Died, three months after operation | No | 25 | 80 | 50 | 40 | 0 |
| 54 | no | Alive | No | 40 | 90 | 5 | 0 | 0 |
| 55 | no | Died,18 months after operation | Yes | 20 | 5 | 20 | 0 | 0 |
| 56 | No smoking, little drinking | Died in 11/2015 | Yes | 25 | 0 | 20 | 0 | 0 |
| 57 | Smoking 40 + years, drinking 40 + years | Lost visit | \ | 7 | 0 | 95 | 0 | 0 |
| 58 | 30 + years of smoking, 20 cigarettes / day, 10 + years of drinking, 500g / day, 4 years of abstinence | Died, 1.5 months after operation | No | 20 | 10 | 30 | 20 | 0 |
| 59 | Smoking 30 + years, 20 cigarettes / day, alcohol 30 + years, 500g / day | Died, 18 months after operation | Yes, 12 months after operation | 20 | 40 | 5 | 25 | 0 |
| 60 | 30 years of drinking and smoking | Lost visit | \ | 10 | 70 | 40 | 10 | 0 |
| 61 | no | Lost visit | \ | 35 | 40 | 60 | 0 | 0 |
| 62 | No smoking, little drinking | Lost visit | \ | 60 | 20 | 80 | 5 | 0 |
| 63 | Smoking for 40 + years, drinking for 40 + years, about 500g / day | Died, 36 months after operation | Yes | 40 | 70 | 40 | 40 | 0 |
| 64 | no | Lost visit | \ | 60 | 70 | 40 | 25 | 0 |
| 65 | no | Alive | No | 35 | 0 | 0 | 10 | 0 |
| 66 | 30 + years of heavy smoking and drinking habits | Lost visit | \ | 40 | 95 | 0 | 45 | 0 |
| 67 | No smoking history, small amount of drinking | Lost visit | \ | 30 | 95 | 0 | 55 | 0 |
| 68 | Drinking for 50 + years, about 250g per day | Alive | No | 50 | 80 | 40 | 0 | 0 |
| 69 | Smoking for 40 years, 20 cigarettes / day, drinking for 40 years, daily drinking 500g | Died, 18 months after operation | Yes, 12 months after operation | 50 | 60 | 10 | 60 | 0 |
| 70 | no | Died, 36 months after operation | Yes | 70 | 80 | 80 | 80 | 1 |
| 71 | no | Lost visit | \ | 70 | 80 | 90 | 15 | 0 |
| 72 | Smoking for 40 years, 20 cigarettes / day, drinking for more than 40 years, 250G / day | Lost visit | \ | 25 | 50 | 85 | 10 | 0 |
| 73 | no | Alive | No | 70 | 0 | 60 | 30 | 0 |
| 74 | Smoking for 30 years, 10 cigarettes / day, drinking for 20 years, 250G / day | Lost visit | \ | 15 | 0 | 10 | 0 | 0 |
| 75 | no | Lost visit | \ | 60 | 80 | 60 | 0 | 0 |
| 76 | Tobacco 30 + years, 20 cigarettes / day, wine 30 + years, 100-150g / day | Lost visit | \ | 60 | 0 | 80 | 0 | 0 |
| 77 | Smoking 40 + years, 20 cigarettes / day, alcohol 40 + years, 100g / day | Died in 02/2018 | No | 40 | 0 | 40 | 60 | 0 |
| 78 | Smoking 40 + years, 20 cigarettes / day, drinking 40 + years, 50g / day | Lost visit | \ | 50 | 0 | 30 | 10 | 0 |
| 79 | no | Died in 02/2018 | Yes | 70 | 80 | 90 | 80 | 0 |
| 80 | Smoking for 30 years, 20 cigarettes / day, quitting for April, drinking for 30 years, 250G / day | Lost visit | \ | 50 | 70 | 30 | 0 | 0 |
| 81 | no | Died in 02/2016 | Yes, 7 months after operation | 60 | 85 | 80 | 95 | 0 |
| 82 | Smoking for 30 years, 20 cigarettes / day, drinking for 30 years, 300 grams / day, quitting for 4 years, quitting for half a year | Alive | No | 25 | 0 | 35 | 0 | 0 |
| 83 | no | Died in 03/2017 | Yes, 12 months after operation | 70 | 0 | 50 | 60 | 0 |
| 84 | No | Died, 18 months after operation | Yes | 70 | 60 | 0 | 75 | 0 |
| 85 | No smoking, drink for 20 years, 150 grams a day | Died in 12/2015 | Yes | 75 | 0 | 60 | 80 | 0 |
| 86 | Smoking for 30 years, about 10 cigarettes a day, drinking for 30 years | Alive | No | 60 | 90 | 70 | 80 | 0 |
| 87 | No smoking and drinking history | Died, 18 months after operation | Yes | 40 | 50 | 50 | 70 | 0 |
| 88 | A history of heavy smoking and drinking | Died in 06/2017 | Unclear | 50 | 70 | 30 | 0 | 0 |
| 89 | No smoking or drinking history | Lost visit | \ | 30 | 0 | 80 | 70 | 0 |
| 90 | No smoking habit, drinking for more than 50 years | Died, 6 months after operation | Yes | 70 | 30 | 20 | 0 | 0 |
| 91 | unknown | Lost visit | \ | 60 | 50 | 40 | 10 | 0 |
| 92 | unknown | Alive | No | 60 | 0 | 10 | 40 | 0 |
| 93 | unknown | Alive | No | 65 | 0 | 20 | 10 | 0 |
| 94 | unknown | Died, 6 months after operation | Yes | 65 | 0 | 0 | 0 | 0 |
| 95 | unknown | Died, 1 month after operation | No | 85 | 0 | 0 | 50 | 1 |
| 96 | unknown | Lost visit | \ | 89 | 15 | 0 | 0 | 0 |
| 97 | unknown | Alive | No | 65 | 15 | 5 | 0 | 0 |
| 98 | unknown | Lost visit | \ | 45 | 5 | 0 | 55 | 0 |
| 99 | unknown | Died, 48 months after operation | Yes | 40 | 60 | 0 | 70 | 0 |
| 100 | unknown | Alive | Unclear | 70 | 0 | 0 | 15 | 0 |
| 101 | unknown | Died, 12 months after operation | Yes | 50 | 0 | 0 | 65 | 0 |
| 102 | unknown | Lost visit | \ | 20 | 0 | 70 | 70 | 0 |
| 103 | unknown | Died, 18 months after operation | Yes | 35 | 0 | 0 | 30 | 0 |
| 104 | unknown | Lost visit | \ | 60 | 0 | 90 | 10 | 0 |
| 105 | Small amount of smoking and drinking history | Lost visit | \ | 40 | 0 | 10 | 40 | 0 |
| 106 | unknown | Lost visit | \ | 60 | 0 | 0 | 70 | 0 |
| 107 | unknown | Lost visit | \ | 50 | 0 | 15 | 0 | 0 |
| 108 | unknown | Lost visit | \ | 60 | 80 | 0 | 75 | 0 |
| 109 | unknown | Died after operation | \ | 60 | 15 | 40 | 85 | 0 |
| 110 | unknown | Lost visit | \ | 70 | 0 | 80 | 90 | 0 |
| 111 | Tobacco 40 + years, 40 cigarettes / day, wine 40 + years, 250G / day, all quit for 4 + months | Died, 2 months after operation | No | 8 | 0 | 0 | 70 | 0 |
| 112 | No | Died in 02/2018 | Yes | 25 | 5 | 0 | 30 | 0 |
| 113 | unknown | Alive | No | 50 | 0 | 40 | 0 | 0 |
| 114 | unknown | Alive | No | 30 | 0 | 0 | 0 | 0 |
| 115 | No | Alive | No | 60 | 30 | 60 | 0 | 0 |
| 116 | No | Died, 12 months after operation | Yes | 50 | 0 | 60 | 75 | 0 |
| 117 | unknown | Died, 12 months after operation |  | 55 | 0 | 10 | 70 | 0 |
| 118 | unknown | Alive | No | 20 | 0 | 50 | 65 | 0 |
| 119 | Drinking for 20 + years, average 1 kg / day, drinking for 2 + years | Died, 48 months after operation | Yes | 40 | 10 | 10 | 60 | 0 |
| 120 | unknown | Died, 24 months after operation | Yes | 40 | 80 | 0 | 85 | 10 |
| 121 | unknown | Alive | No | 40 | 5 | 10 | 0 | 0 |
| 122 | unknown | Died, 36 months after operation | Yes | 40 | 0 | 5 | 80 | 0 |
| 123 | unknown | Alive | No | 50 | 40 | 0 | 0 | 0 |
| 124 | 20 + years of smoking history, 15 years of quitting smoking, no drinking history | Alive | No | 55 | 80 | 0 | 65 | 0 |
| 125 | Smoking for more than 40 years, drinking for 18 + years and 150 grams per day | Alive | No | 60 | 0 | 80 | 60 | 0 |
| 126 | No | Died, 6 months after operation | Yes | 10 | 30 | 40 | 60 | 5 |
| 127 | Smoking 40 cigarettes / day, 20 + years, drinking 250G / day , 20 + years | Died, 22 months after operation | Yes | 5 | 0 | 50 | 70 | 0 |
| 128 | Smoking for 40 + years, 20 cigarettes / day, drinking for 40 + years, up to 1000 grams | Died, 3 months after operation | Unclear | 45 | 80 | 0 | 95 | 0 |
| 129 | No | Alive | No | 55 | 0 | 20 | 0 | 0 |
| 130 | More than 20 years of smoking, 20 cigarettes a day, no history of drinking habits | Alive | No | 55 | 80 | 0 | 0 | 0 |
| 131 | No | Alive | No | 40 | 0 | 5 | 20 | 0 |
| 132 | Smoking about 20 cigarettes / day, 30 years, drinking about 500ml / day , 20 + years | Died in 10/2019 | Yes | 35 | 0 | 5 | 55 | 0 |
| 133 | Smoking for 50 + years, not quitting smoking, drinking for 50 + years, up to 500g / day | Died, 12 months after operation | Yes | 60 | 0 | 20 | 60 | 0 |
| 134 | A history of heavy smoking and drinking | Died, 12 months after operation | Yes | 50 | 5 | 5 | 60 | 0 |
| 135 | Smoke leaf tobacco for 40 years, specific amount unknown, no drinking habits | Died, 18 months after operation | Yes | 50 | 5 | 5 | 85 | 2 |
| 136 | Smoking for 20 years, 1 pack / day, drinking occasionally, | Alive | No | 40 | 0 | 60 | 30 | 0 |
| 137 | Smoking for 40 years, 5 cigarettes per day, drinking for 20 years, with an average of 50g per day, and abstinence for 10 years | Died in 10/2017 | Yes | 30 | 5 | 0 | 65 | 0 |
| 138 | A history of heavy smoking and drinking | Died in 08/2014 | Yes | 55 | 5 | 5 | 80 | 0 |
| 139 | No | Died in 11/2015 | Yes | 15 | 60 | 5 | 80 | 0 |
| 140 | A history of smoking and drinking | Lost visit | \ | 45 | 85 | 0 | 20 | 0 |
| 141 | A history of heavy smoking and drinking | Lost visit | \ | 25 | 80 | 0 | 15 | 0 |
| 142 | unknown | Lost visit | \ | 45 | 55 | 0 | 20 | 0 |
| 143 | unknown | Lost visit | \ | 60 | 5 | 0 | 15 | 0 |
| 144 | Smoking for 30 years, with an average of 20 cigarettes per day, has stopped smoking for 2 years. Drinking for 30 years, average 4 liang / day | Alive | No | 65 | 0 | 5 | 0 | 0 |
| 145 | A history of heavy smoking and drinking | Died in 05/2016 | Yes | 60 | 5 | 5 | 0 | 0 |
| 146 | Tobacco 40 + years, about 50g / day, wine 40 + years, about 150-200 g / day | Lost visit | \ | 85 | 0 | 5 | 50 | 0 |
| 147 | Smoking 50 + years, 1 pack / day, drinking 50 + years, 250g / day | Died, 36 months after operation | Yes | 50 | 0 | 80 | 30 | 0 |
| 148 | Smoking for 30 + years, 7-8 cigarettes / day, drinking for 30 + years, 200g / day | Died in 09/2016 | Yes | 25 | 85 | 20 | 0 | 0 |
| 149 | Smoking 50 + years, 1 pack / day, drinking 50 + years, 500g / day | Lost visit | \ | 50 | 95 | 60 | 0 | 0 |
| 150 | No smoking or drinking history | Alive | No | 40 | 90 | 80 | 0 | 0 |
| 151 | unknown | Lost visit | \ | 60 | 0 | 90 | 0 | 0 |
| 152 | No smoking or drinking history | Died, 12 months after operation | Yes | 35 | 0 | 20 | 60 | 0 |
| 153 | Smoking for more than 40 years, 20 cigarettes per day, drinking for more than 40 years, 150g per day | Died, 12 months after operation | Yes | 60 | 95 | 80 | 75 | 0 |
| 154 | Smoking for 40 + years, 1 pack / day, drinking for 30 + years, quitting for 5 + years | Alive | No | 40 | 0 | 50 | 10 | 0 |
| 155 | Smoking history 40 + years, 5 cigarettes per day, drinking history 30 + years, 300ml per day | Died, 24 months after operation | No | 40 | 10 | 60 | 5 | 0 |
| 156 | Smoking for 20 + years, with an average of 10 cigarettes / day, and smoking cessation for 20 + years | Alive | Unclear | 30 | 80 | 40 | 30 | 0 |
| 157 | Occasionally smoking, drinking for 30 years, 6 Liang a day | Lost visit | \ | 60 | 0 | 30 | 20 | 0 |
| 158 | Smoking for 30 years, 20 cigarettes / day, drinking for 30 years, with an average of 22 / day | Lost visit | \ | 70 | 0 | 80 | 85 | 0 |
| 159 | Smoking for 30 + years, 15 cigarettes / day. About 30 years of alcohol, small quantity, now quit drinking | Died, 24 months after operation | Yes | 40 | 0 | 30 | 70 | 0 |
| 160 | No smoking or drinking history | Alive | Unclear | 30 | 0 | 10 | 10 | 0 |
| 161 | Smoking for more than 20 years, 40 cigarettes per day, drinking for more than 20 years, 250g per day | Lost visit | \ | 70 | 0 | 0 | 0 | 0 |
| 162 | Smoking for 40 years, 20 cigarettes / day, drinking for 40 years, average 50-100g / day | Lost visit | \ | 40 | 70 | 60 | 80 | 0 |
| 163 | Smoking for 40 years, 20 cigarettes / day. Drinking for 40 years, with an average of 100 g / day | Lost visit | \ | 60 | 0 | 0 | 0 | 0 |
| 164 | No | Died, 16 months after operation | Yes | 80 | 0 | 0 | 30 | 0 |
| 165 | unknown | Died, 12 months after operation | Yes | 65 | 0 | 5 | 25 | 0 |
| 166 | unknown | Alive | No | 65 | 0 | 0 | 10 | 0 |
| 167 | unknown | Lost visit | \ | 40 | 25 | 60 | 10 | 0 |
| 168 | unknown | Lost visit | \ | 45 | 0 | 0 | 5 | 0 |
| 169 | unknown | Died, 84 months after operation | Yes | 50 | 0 | 80 | 55 | 0 |
| 170 | unknown | Died, 12 months after operation | Yes | 55 | 5 | 5 | 55 | 0 |
| 171 | unknown | Died, 6 months after operation |  | 15 | 40 | 0 | 85 | 0 |
| 172 | Smoking for 30 years, one pack a day, drinking occasionally | Lost visit | \ | 45 | 0 | 5 | 80 | 0 |
| 173 | unknown | Lost visit | \ | 50 | 0 | 0 | 0 | 0 |
| 174 | unknown | Lost visit | \ | 35 | 70 | 90 | 0 | 0 |
| 175 | unknown | Died, 18 months after operation | Yes | 60 | 0 | 15 | 70 | 0 |
| 176 | unknown | Alive | No | 30 | 0 | 60 | 35 | 0 |
| 177 | unknown | Lost visit | \ | 40 | 0 | 0 | 10 | 0 |
| 178 | unknown | Lost visit | \ | 60 | 50 | 5 | 80 | 0 |
| 179 | unknown | Lost visit | \ | 40 | 50 | 0 | 75 | 0 |
| 180 | unknown | Lost visit | \ | 30 | 5 | 35 | 60 | 5 |
| 181 | unknown | Died after operation | \ | 70 | 0 | 5 | 75 | 0 |
| 182 | unknown | Died, 3 months after operation |  | 65 | 70 | 80 | 70 | 0 |
| 183 | unknown | Died, 36 months after operation | Yes | 65 | 5 | 5 | 0 | 0 |
| 184 | unknown | Lost visit | \ | 60 | 5 | 5 | 70 | 0 |
| 185 | unknown | Died, 6 months after operation | No | 30 | 20 | 0 | 60 | 0 |
| 186 | unknown | Lost visit | \ | 40 | 20 | 20 | 55 | 0 |
| 187 | unknown | Lost visit | \ | 9 | 0 | 0 | 85 | 0 |
| 188 | unknown | Alive | No | 65 | 0 | 5 | 40 | 0 |
| 189 | unknown | Lost visit | \ | 65 | 60 | 0 | 55 | 0 |
| 190 | unknown | Lost visit | \ | 60 | 5 | 5 | 55 | 0 |
| 191 | unknown | Died, 24 months after operation | Yes | 45 | 85 | 20 | 20 | 0 |
| 192 | unknown | Lost visit | \ | 40 | 0 | 45 | 25 | 0 |
| 193 | unknown | Died, 3 months after operation | Yes | 50 | 60 | 5 | 70 | 0 |
| 194 | unknown | Died, 6 months after operation | Yes | 30 | 0 | 5 | 30 | 0 |
| 195 | unknown | Lost visit | \ | 40 | 5 | 0 | 0 | 0 |
| 196 | unknown | Lost visit | \ | 45 | 5 | 0 | 55 | 0 |
| 197 | unknown | Died, 18 months after operation | Yes | 75 | 0 | 5 | 65 | 0 |
| 198 | unknown | Lost visit | \ | 60 | 0 | 0 | 15 | 0 |
| 199 | unknown | Lost visit | \ | 20 | 10 | 35 | 50 | 0 |
| 200 | unknown | Died, 24 months after operation | Yes | 70 | 5 | 5 | 0 | 0 |
| 201 | unknown | Died, 39 months after operation | Yes | 40 | 0 | 25 | 85 | 0 |
| 202 | unknown | Lost visit | \ | 40 | 30 | 0 | 30 | 0 |
| 203 | unknown | Lost visit | \ | 70 | 70 | 70 | 20 | 0 |
| 204 | unknown | Died, 6 months after operation | Yes | 50 | 0 | 5 | 65 | 0 |
| 205 | unknown | Died, 12 months after operation | Yes | 40 | 0 | 0 | 65 | 0 |
| 206 | unknown | Lost visit | \ | 75 | 0 | 5 | 15 | 0 |
| 207 | unknown | Lost visit | \ | 75 | 0 | 0 | 60 | 5 |
| 208 | unknown | Died after operation | \ | 60 | 0 | 50 | 95 | 0 |
| 209 | unknown | Lost visit | \ | 15 | 0 | 0 | 0 | 0 |
| 210 | unknown | Died after operation | Yes | 65 | 20 | 0 | 65 | 0 |
| 211 | unknown | Died, 10 months after operation | Yes | 75 | 0 | 80 | 85 | 0 |
| 212 | unknown | Died, 1 month after operation | Yes | 40 | 0 | 0 | 0 | 0 |
| 213 | unknown | Alive | No | 25 | 0 | 0 | 0 | 0 |
| 214 | unknown | Lost visit | \ | 20 | 0 | 30 | 0 | 0 |
| 215 | unknown | Lost visit | \ | 80 | 0 | 60 | 85 | 0 |
| 216 | unknown | Alive | No | 30 | 25 | 95 | 20 | 0 |
| 217 | unknown | Alive | No | 5 | 30 | 0 | 15 | 0 |
| 218 | unknown | Alive | No | 40 | 0 | 60 | 20 | 0 |
| 219 | unknown | Alive | No | 60 | 40 | 0 | 0 | 0 |
| 220 | unknown | Alive | No | 7 | 0 | 5 | 85 | 0 |
| 221 | unknown | Died, 5 months after operation | Yes | 60 | 0 | 50 | 35 | 0 |
| 222 | unknown | Died, 12 months after operation | Yes | 55 | 5 | 35 | 95 | 0 |
| 223 | unknown | Lost visit | \ | 50 | 10 | 10 | 20 | 0 |
| 224 | unknown | Died, 72 months after operation | Yes | 80 | 80 | 20 | 65 | 0 |
| 225 | unknown | Alive | No | 40 | 60 | 0 | 20 | 0 |
| 226 | unknown | Died, 24 months after operation | Yes | 50 | 0 | 0 | 65 | 0 |
| 227 | unknown | Lost visit | \ | 25 | 60 | 80 | 30 | 0 |
| 228 | unknown | Died, 3 months after operation | No | 40 | 0 | 10 | 0 | 0 |
| 229 | unknown | Lost visit | \ | 20 | 10 | 0 | 0 | 0 |
| 230 | unknown | Died, 6 months after operation | Yes | 30 | 0 | 0 | 15 | 0 |
| 231 | unknown | Died, 6 months after operation | Yes | 80 | 0 | 0 | 0 | 0 |
